# Supplementary material for: Organogel formation rationalized by Hansen solubility parameters
Source: Royal Society of Chemistry journal article supplement (doi:10.1039/c1cc13244j), 2011-01-01
Supplement: c1cc13244j.pdf [file c1cc13244j.pdf]

Supporting information

## **Organogel formation rationalized by Hansen solubility parameters**

**Matthieu Raynal and Laurent Bouteiller**

### **Procedure for the determination of the centre of the solubility sphere:**

In the Excel worksheet provided, the coordinates of the centre ( $\delta_d, \delta_p, \delta_h$ ) and the radius ( $R_{sol}$ ) of a sphere were optimized to include as many S points as possible and to exclude as many I and G points as possible.

### **Procedure for the determination of the centre of the gel sphere:**

In the same Excel worksheet, the coordinates of the centre ( $\delta_d, \delta_p, \delta_h$ ) and the radius ( $R_{sol}$ ) of a sphere were optimized to include as many G points as possible and to exclude as many I and S points as possible.

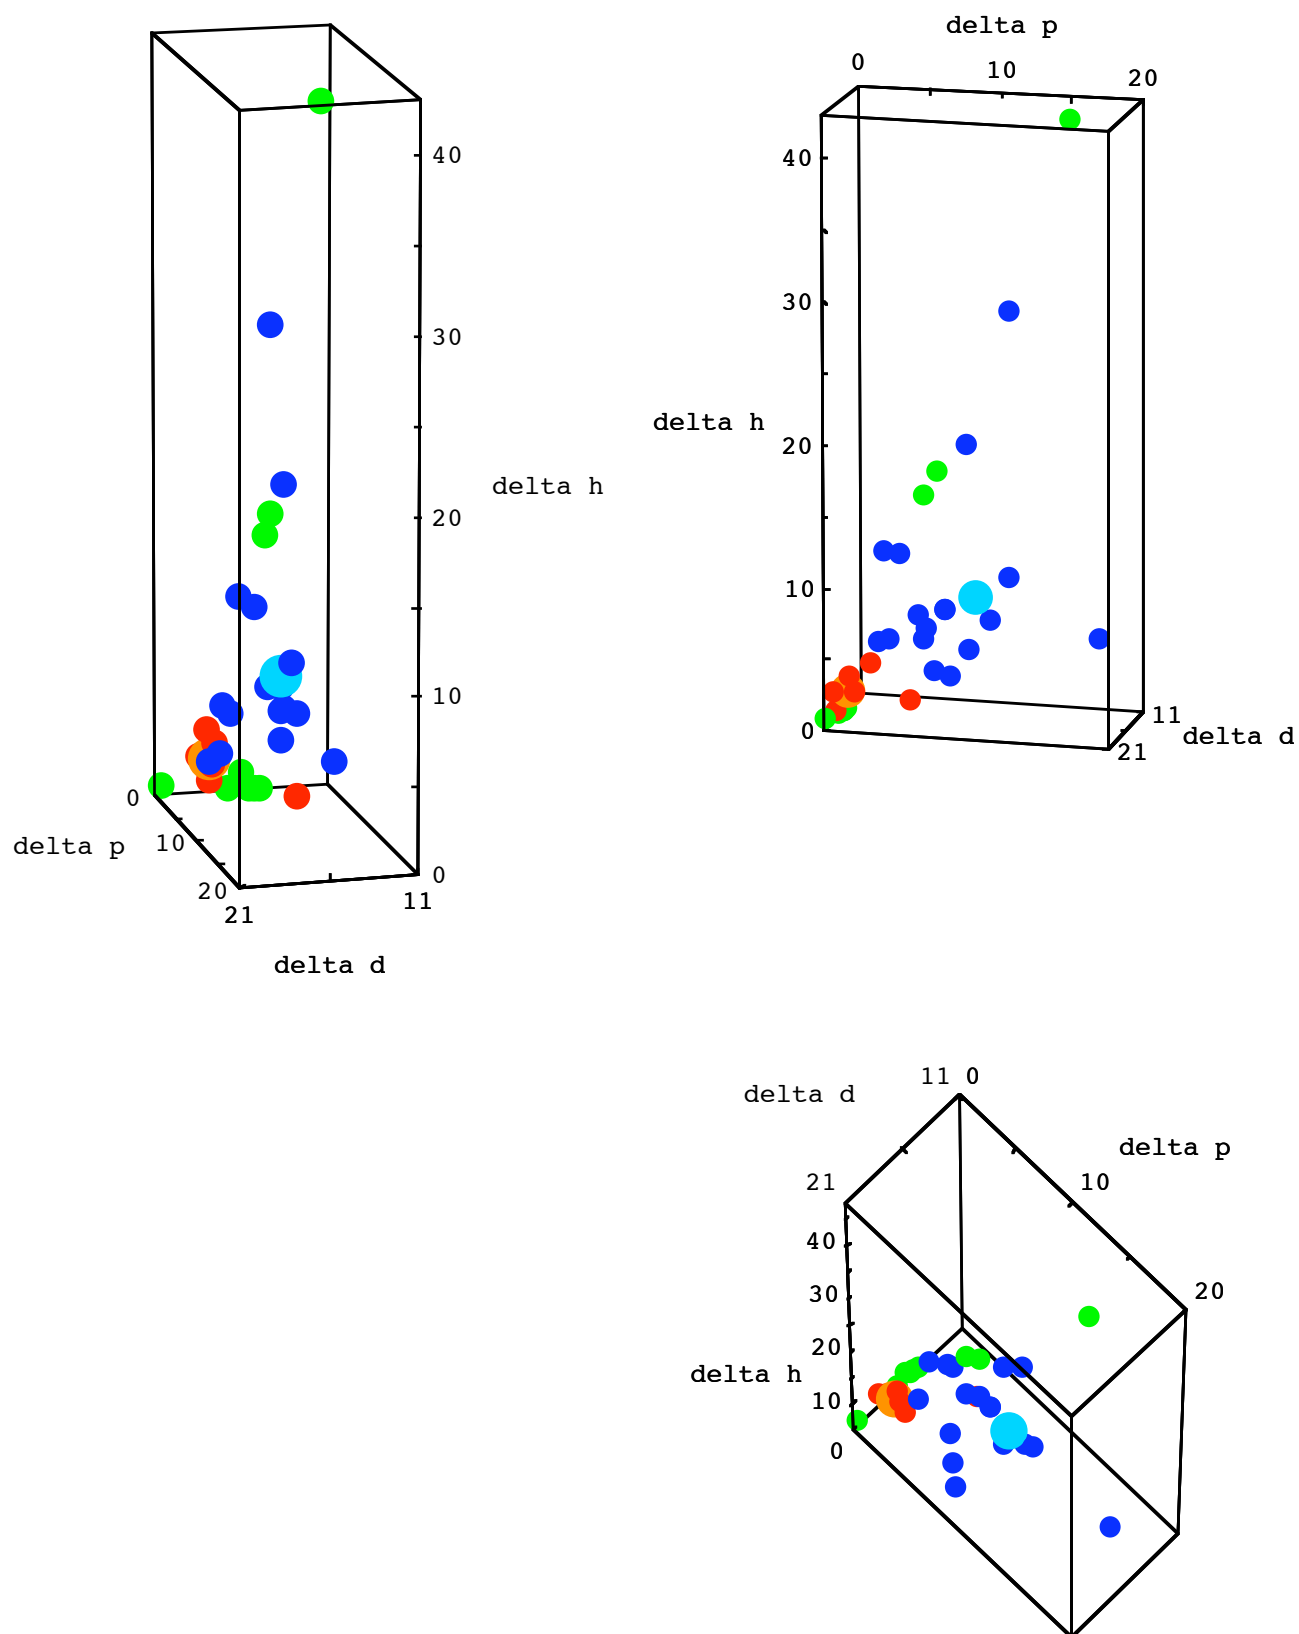

Figure S1. Solubility data for LMWG 1 (30g/L) represented in Hansen space (Units:  $\text{MPa}^{0.5}$ ) (data taken from reference 1). Blue: soluble; red: gel; green: insoluble. Cyan: centre of the solubility sphere; orange: centre of the gelation sphere.

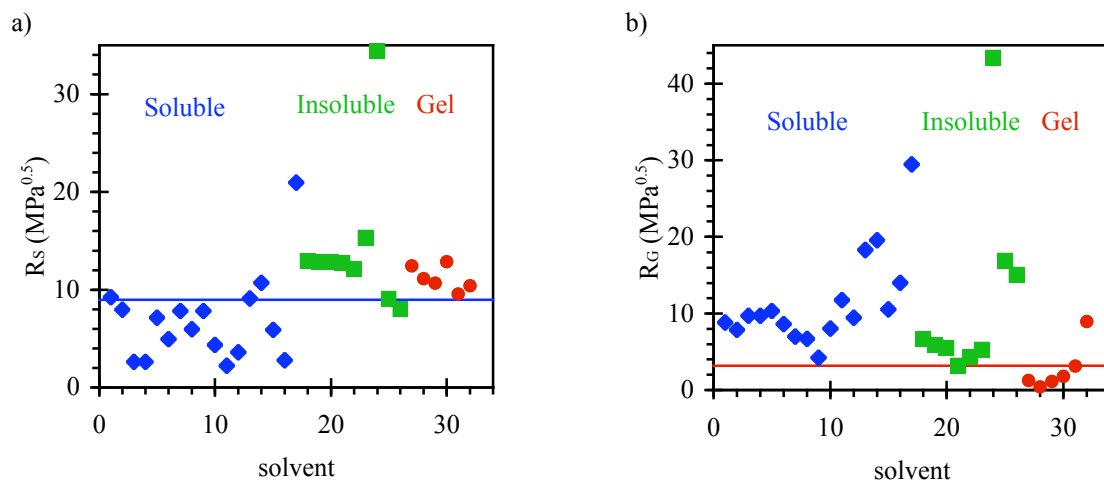

Figure S2. Distances in Hansen space to the centre of the solubility sphere [ $\delta_d = 16.0$ ;  $\delta_p = 9.4$ ;  $\delta_h = 8.7$ ;  $R_{Sol} = 9.0 \text{ MPa}^{0.5}$ ] (a) or to the centre of the gelation sphere [ $\delta_d = 18.0$ ;  $\delta_p = 1.0$ ;  $\delta_h = 2.0$ ;  $R_{Gel} = 3.2 \text{ MPa}^{0.5}$ ] (b) for LMWG 1. The line represents the radius of the sphere. Blue: soluble; red: gel; green: insoluble.

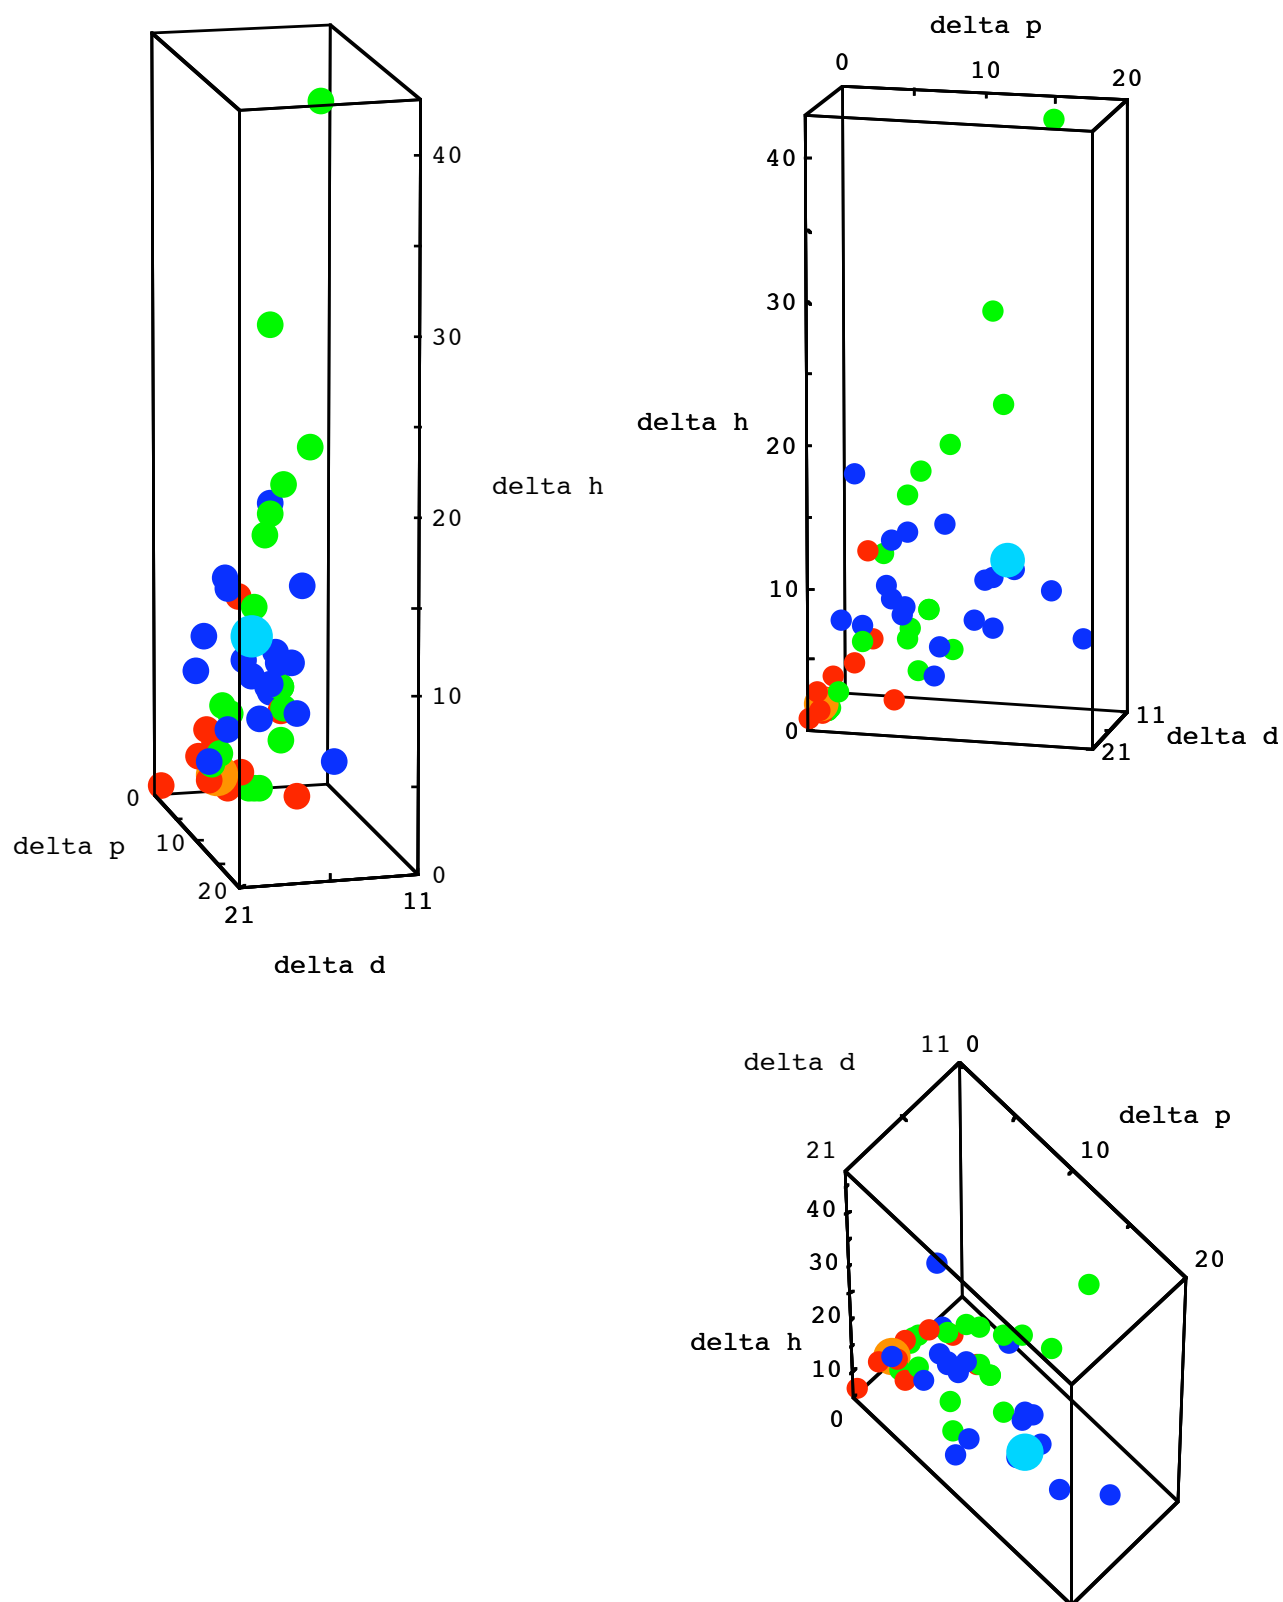

Figure S3. Solubility data for LMWG 2 (30g/L, room temperature) represented in Hansen space (Units:  $\text{MPa}^{0.5}$ ) (data taken from reference 2). Blue: soluble; red: gel; green: insoluble. Cyan: centre of the solubility sphere; orange: centre of the gelation sphere.

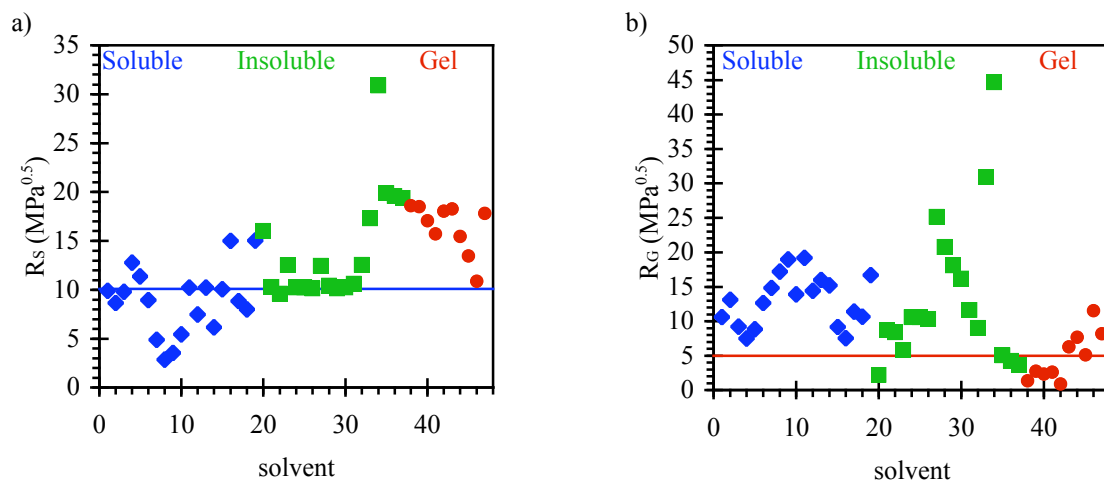

Figure S4. Distances in Hansen space to the centre of the **solubility sphere** [ $\delta_d = 18.7$ ;  $\delta_p = 13.6$ ;  $\delta_h = 12.3$ ;  $R_{Sol} = 10.1$  MPa<sup>0.5</sup>] (a) or to the centre of the **gelation sphere** [ $\delta_d = 17.4$ ;  $\delta_p = 0.0$ ;  $\delta_h = 0.9$ ;  $R_{Gel} = 5.0$  MPa<sup>0.5</sup>] (b) for LMWG **2**. The line represents the radius of the sphere. Blue: soluble; red: gel; green: insoluble.

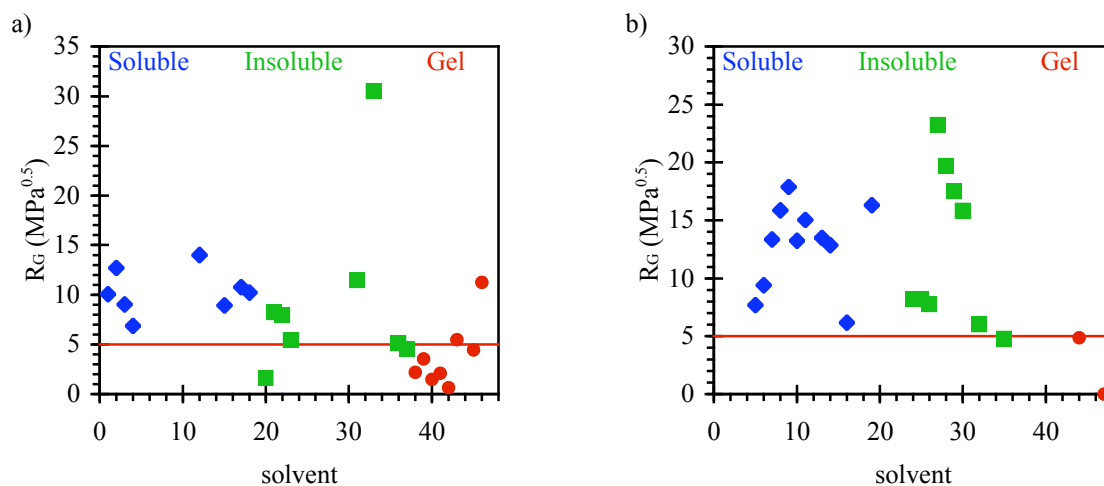

Figure S5. A better correlation is obtained by considering 2 gelation spheres: the same data as in figure S4b is plotted again. Each solvent is represented only once, either in figure S5a or in figure S5b: only the shortest distance to the gelation sphere centers is considered. Distances in Hansen space to the centre of the **first gelation sphere** [ $\delta_d = 17.8$ ;  $\delta_p = 0.0$ ;  $\delta_h = 1.2$ ;  $R_{Gel} = 5.0$ ] (a) or to the centre of the **second gelation sphere** [ $\delta_d = 13.9$ ;  $\delta_p = 4.3$ ;  $\delta_h = 0.6$ ;  $R_{Gel} = 5.0$ ] (b) for LMWG **2**. The line represents the radius of the sphere. Blue: soluble; red: gel; green: insoluble.

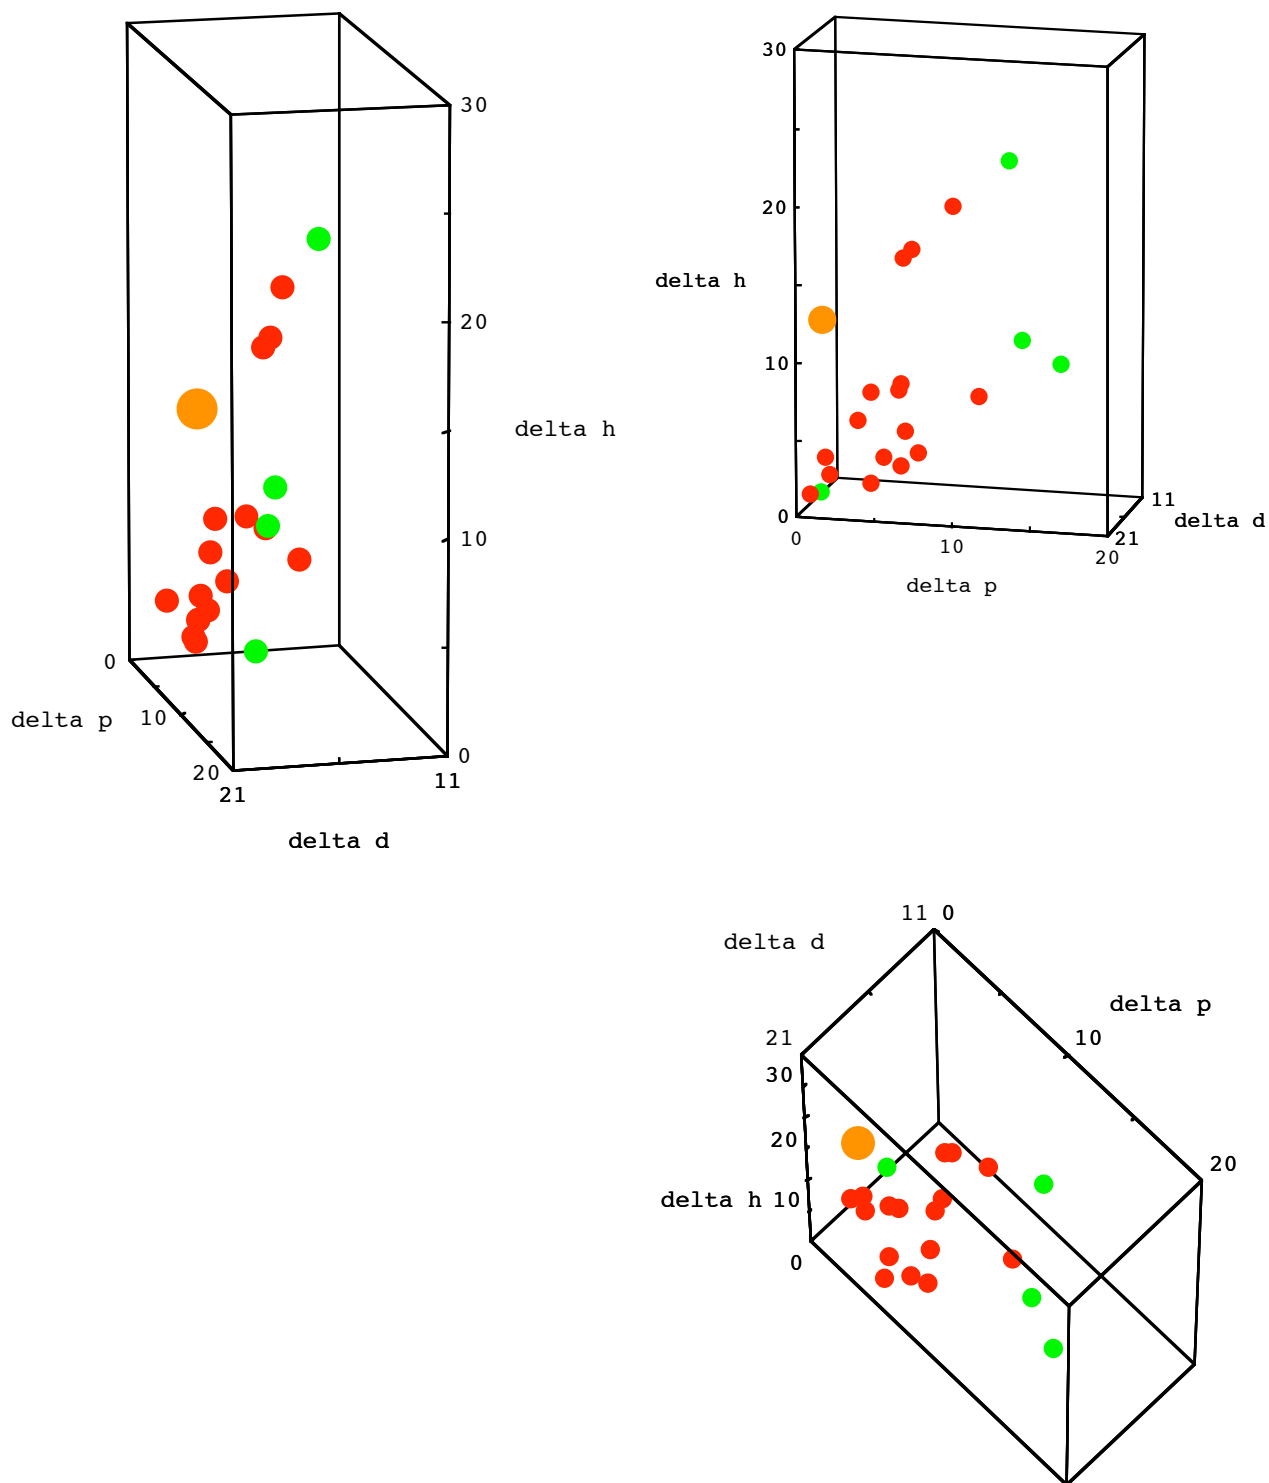

Figure S6. Solubility data for LMWG 3 (< 40mM, room temperature) represented in Hansen space (Units:  $\text{MPa}^{0.5}$ ) (data taken from reference 3). Red: gel; green: insoluble. Orange: centre of the gelation sphere. *Good solvents (S) for this system were not reported, but it does not prevent the determination of a gelation sphere.*

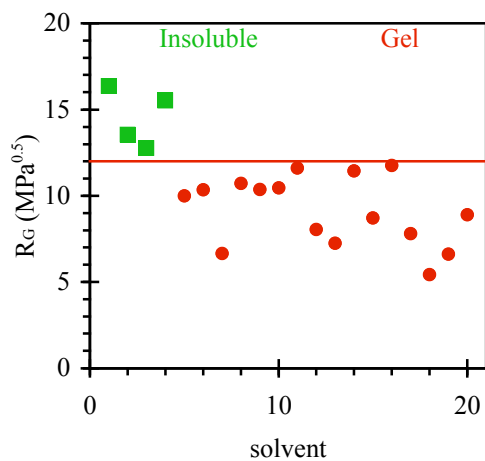

Figure S7. Distances in Hansen space to the centre of the **gelation sphere** [ $\delta_d = 18.0$ ;  $\delta_p = 1.0$ ;  $\delta_h = 12.0$ ;  $R_{Gel} = 12.0 \text{ MPa}^{0.5}$ ] for LMWG **3**. The line represents the radius of the sphere. Red: gel; green: insoluble.

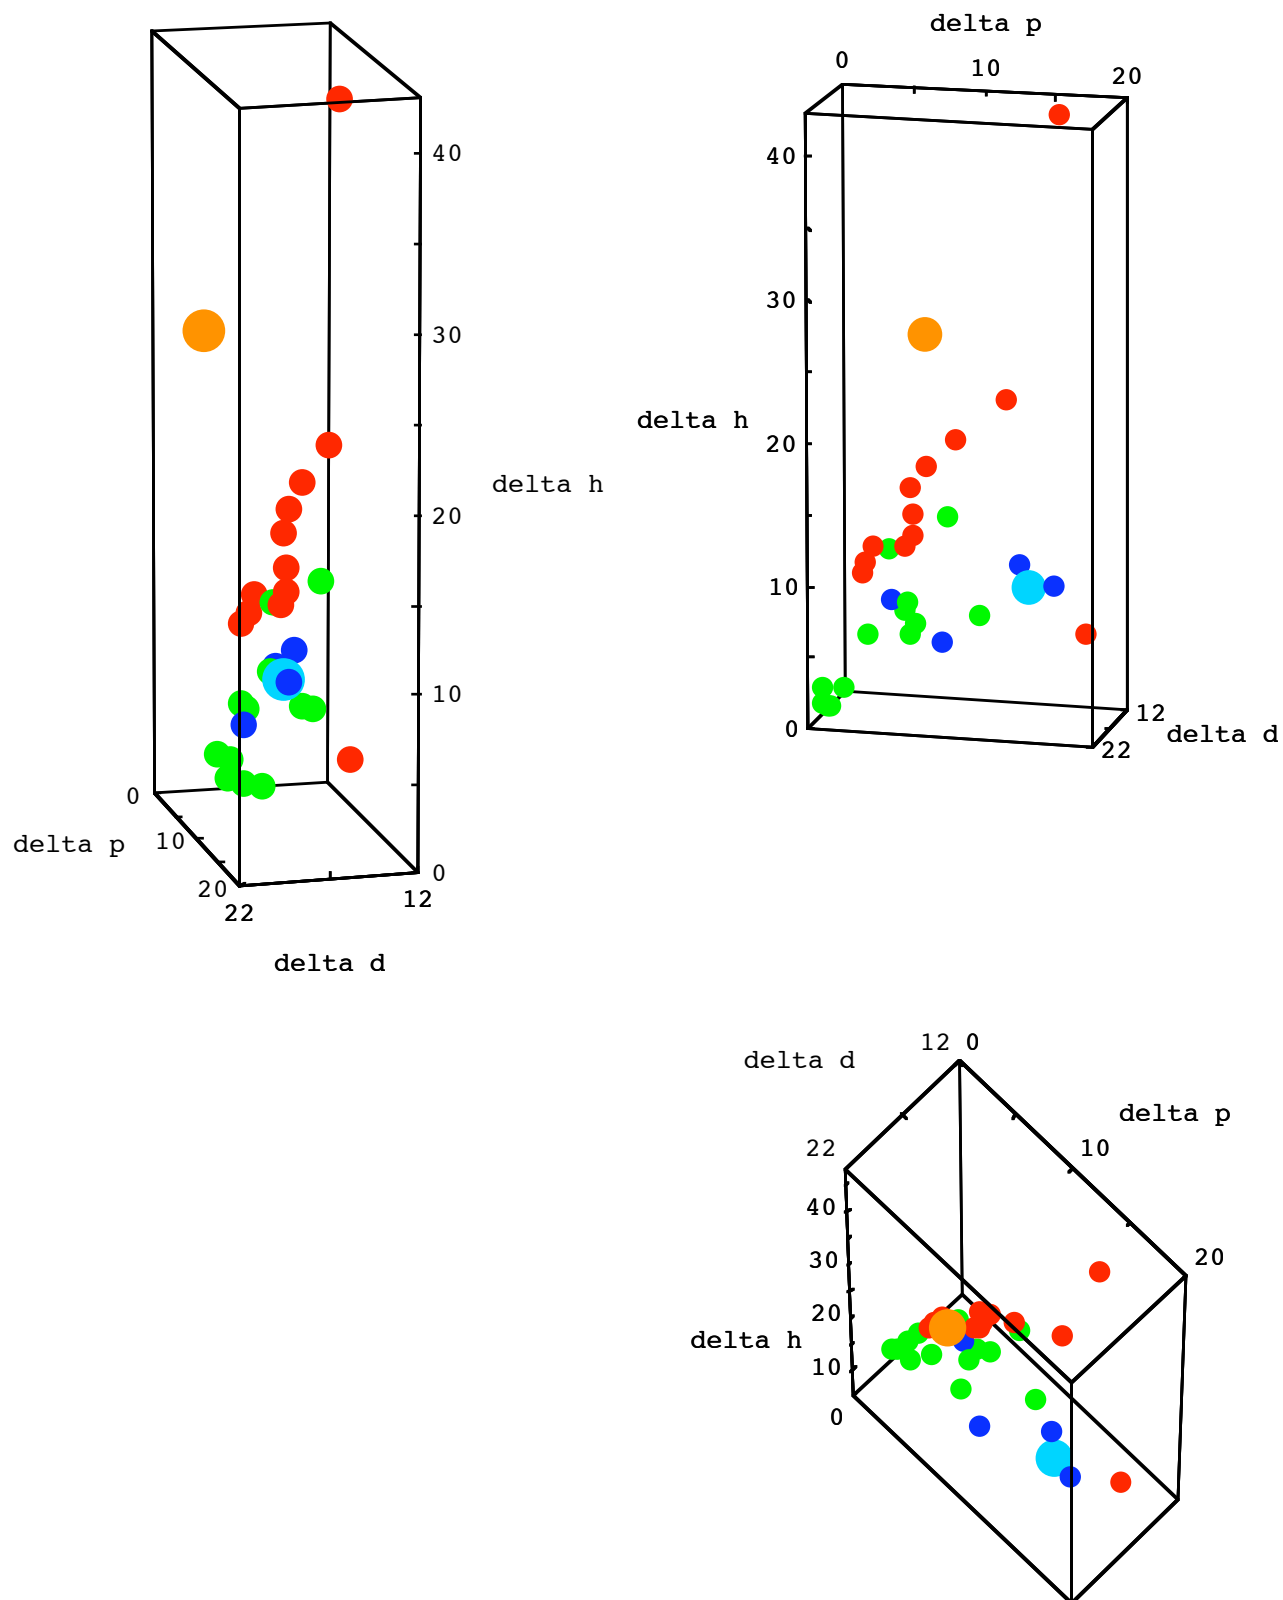

Figure S8. Solubility data for LMWG 4 (25g/L, room temperature) represented in Hansen space (Units:  $\text{MPa}^{0.5}$ ) (data taken from reference 4). Blue: soluble; red: gel; green: insoluble. Cyan: centre of the solubility sphere; orange: centre of the gelation sphere.



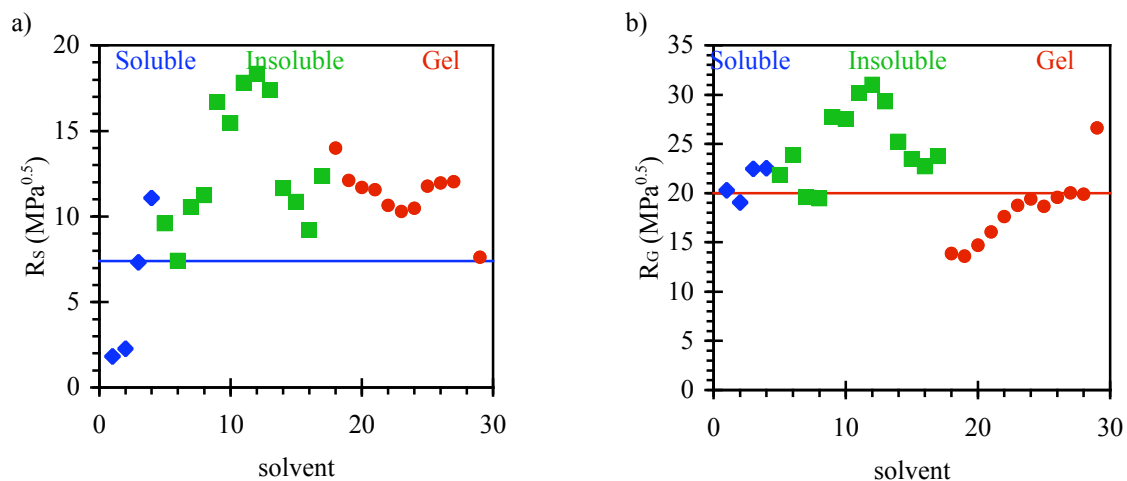

Figure S9. Distances in Hansen space to the centre of the **solubility sphere**\* [ $\delta_d = 18.2$ ;  $\delta_p = 14.7$ ;  $\delta_h = 9.9$ ;  $R_{Sol} = 7.4$  MPa<sup>0.5</sup>] (a) or to the centre of the **gelation sphere** [ $\delta_d = 21.1$ ;  $\delta_p = 8.2$ ;  $\delta_h = 27.9$ ;  $R_{Gel} = 20.0$  MPa<sup>0.5</sup>] (b) for LMWG **4**. The line represents the radius of the sphere. Blue: soluble; red: gel; green: insoluble.

\* The location of the solubility sphere is not precise, due to the limited data available (too few good solvents (S)).

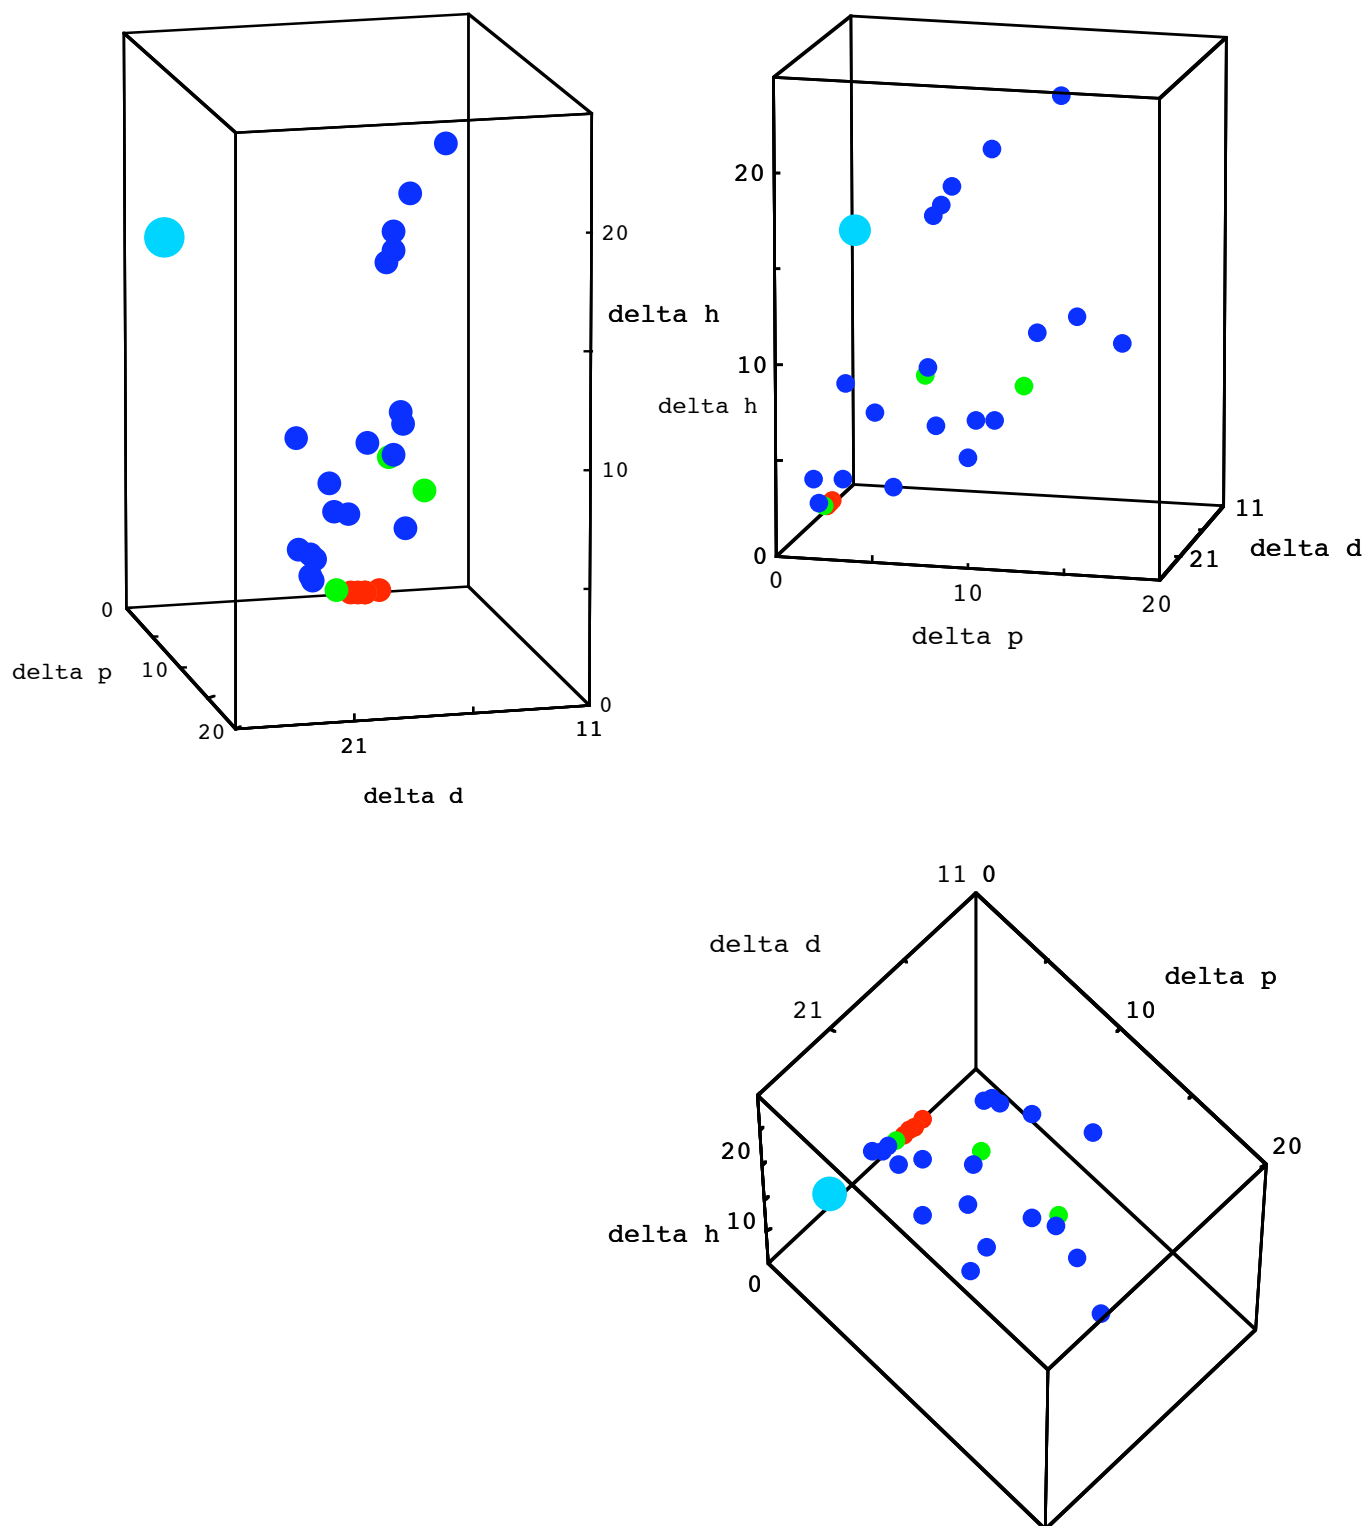

Figure S10. Solubility data for LMWG **5** (< 16g/L, 25°C) represented in Hansen space (Units:  $\text{MPa}^{0.5}$ ) (data taken from reference 5). Blue: soluble; red: gel; green: insoluble. Cyan: centre of the solubility sphere.

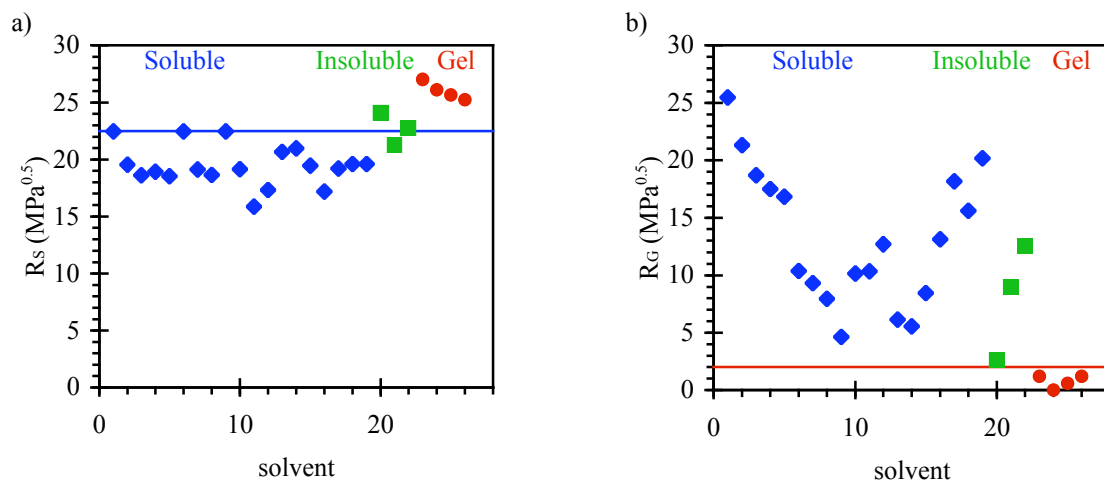

Figure S11. Distances in Hansen space to the centre of the **solubility sphere** [ $\delta_d = 25.2$ ;  $\delta_p = 4.1$ ;  $\delta_h = 17.0$ ;  $R_{sol} = 22.5 \text{ MPa}^{0.5}$ ] (a) or to the centre of the **gelation sphere** [ $\delta_d = 15.5$ ;  $\delta_p = 0.0$ ;  $\delta_h = 0.0$ ;  $R_{gel} = 2.0 \text{ MPa}^{0.5}$ ] (b) for LMWG 5. The line represents the radius of the sphere. Blue: soluble; red: gel; green: insoluble.

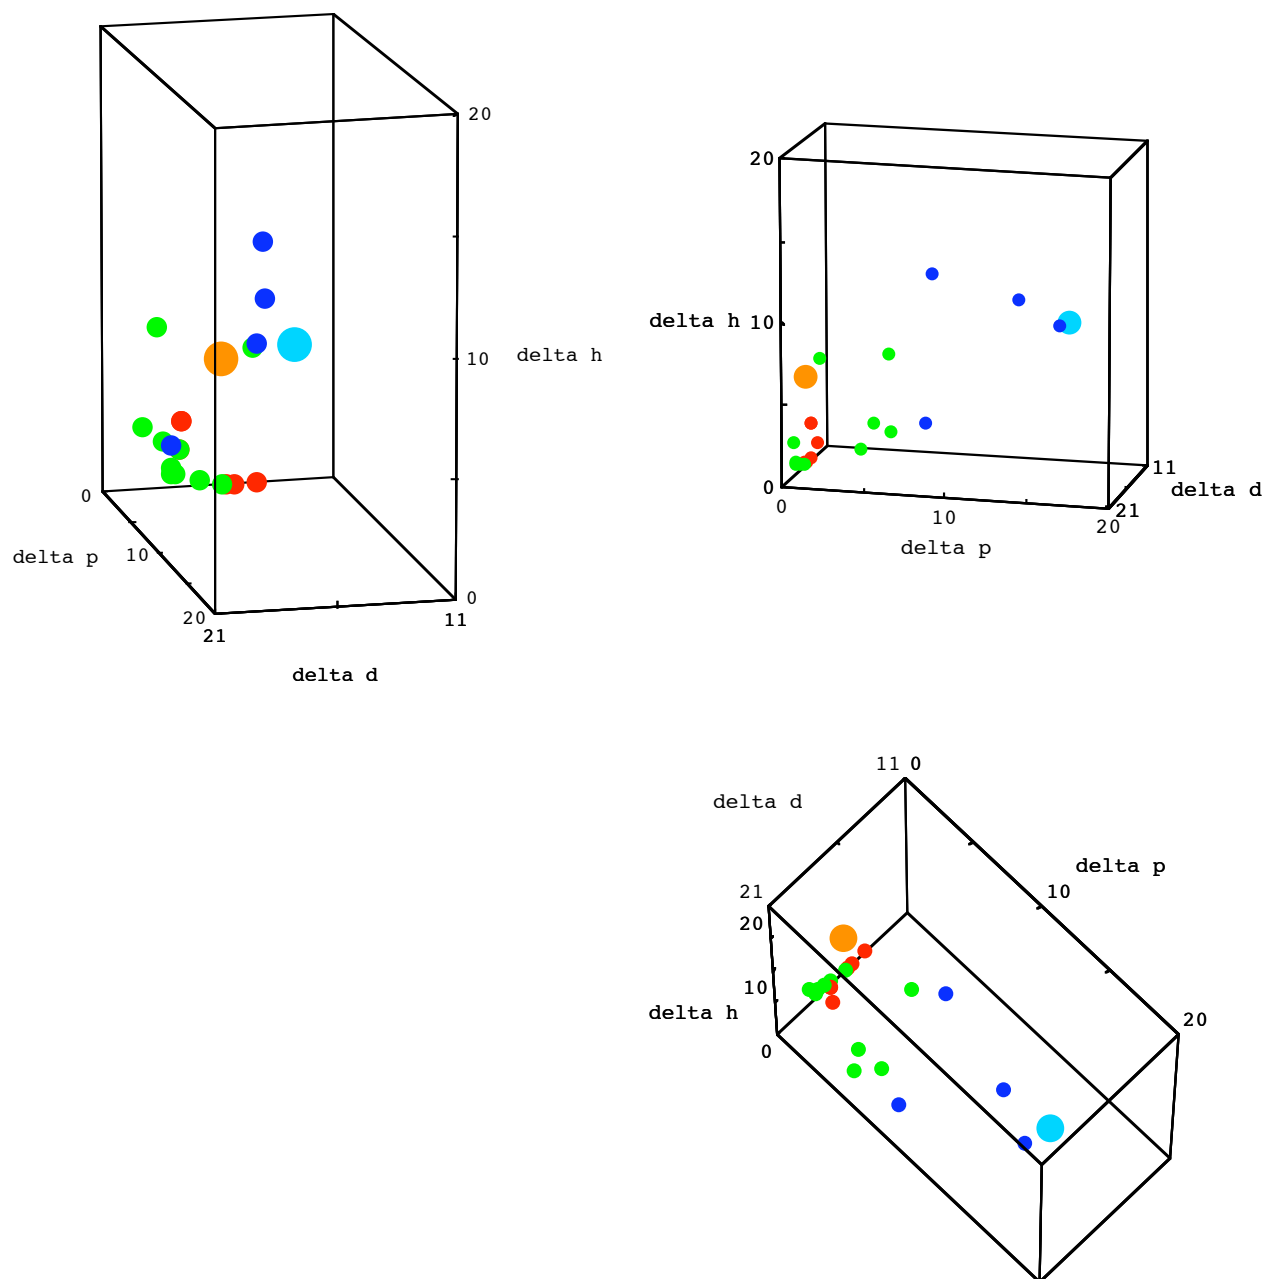

Figure S12. Solubility data for LMWG **6** (< 50g/L, room temperature) represented in Hansen space (Units:  $\text{MPa}^{0.5}$ ) (data taken from reference 6). Blue: soluble; red: gel; green: insoluble. Cyan: centre of the solubility sphere; orange: centre of the gelation sphere.

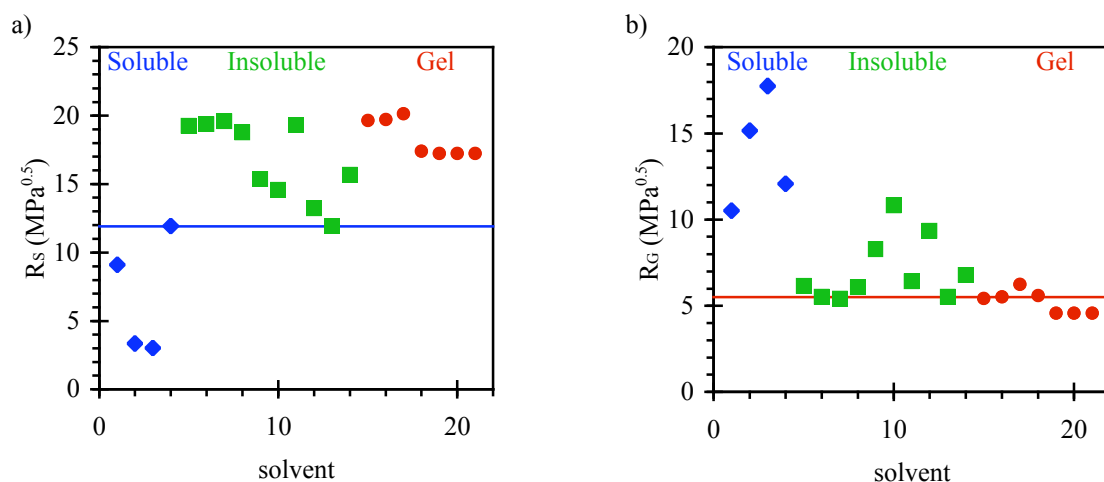

Figure S13. Distances in Hansen space to the centre of the **solubility sphere**\* [ $\delta_d = 16.9$ ;  $\delta_p = 16.7$ ;  $\delta_h = 10.1$ ;  $R_{Sol} = 11.9$  MPa<sup>0.5</sup>] (a) or to the centre of the **gelation sphere** [ $\delta_d = 15.9$ ;  $\delta_p = 0.1$ ;  $\delta_h = 5.4$ ;  $R_{Gel} = 5.5$  MPa<sup>0.5</sup>] (b) for LMWG **6**. The line represents the radius of the sphere. Blue: soluble; red: gel; green: insoluble.

\* The location of the solubility sphere is not precise, due to the limited data available (too few good solvents (S)).

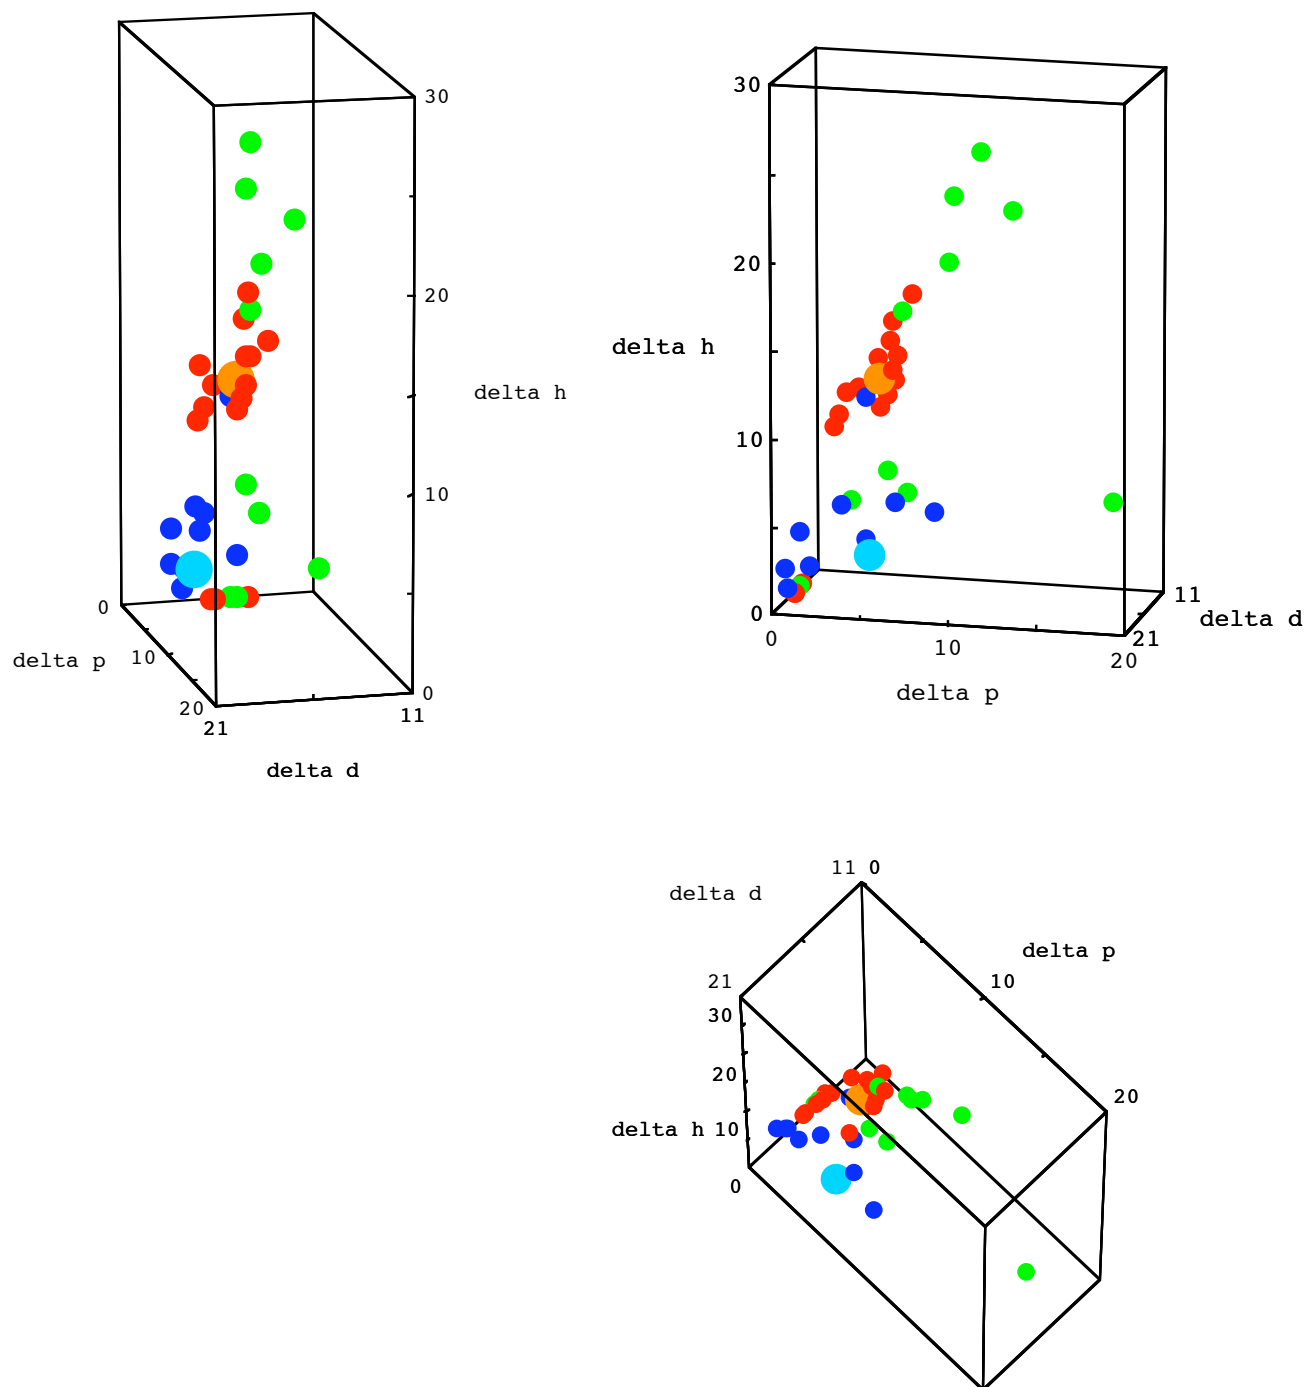

Figure S14. Solubility data for LMWG 7 (20g/L, room temperature) represented in Hansen space (Units:  $\text{MPa}^{0.5}$ ) (data taken from reference 7). Blue: soluble; red: gel; green: insoluble. Cyan: centre of the solubility sphere; orange: centre of the gelation sphere.

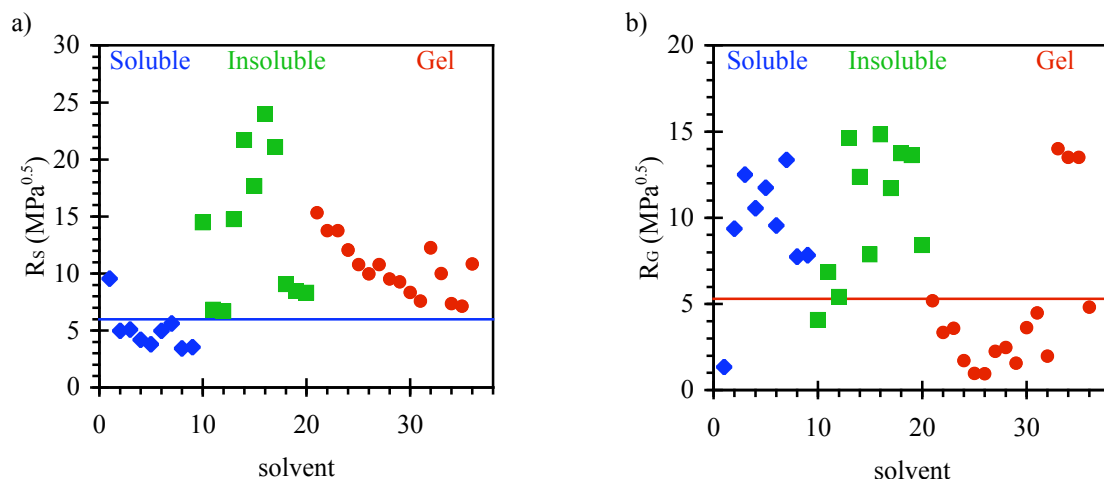

Figure S15. Distances in Hansen space to the centre of the **solubility sphere** [ $\delta_d = 18.4$ ;  $\delta_p = 5.0$ ;  $\delta_h = 2.9$ ;  $R_{Sol} = 6.0 \text{ MPa}^{0.5}$ ] (a) or to the centre of the **gelation sphere** [ $\delta_d = 16.2$ ;  $\delta_p = 5.0$ ;  $\delta_h = 12.5$ ;  $R_{Gel} = 5.3 \text{ MPa}^{0.5}$ ] (b) for LMWG 7. The line represents the radius of the sphere. Blue: soluble; red: gel; green: insoluble.

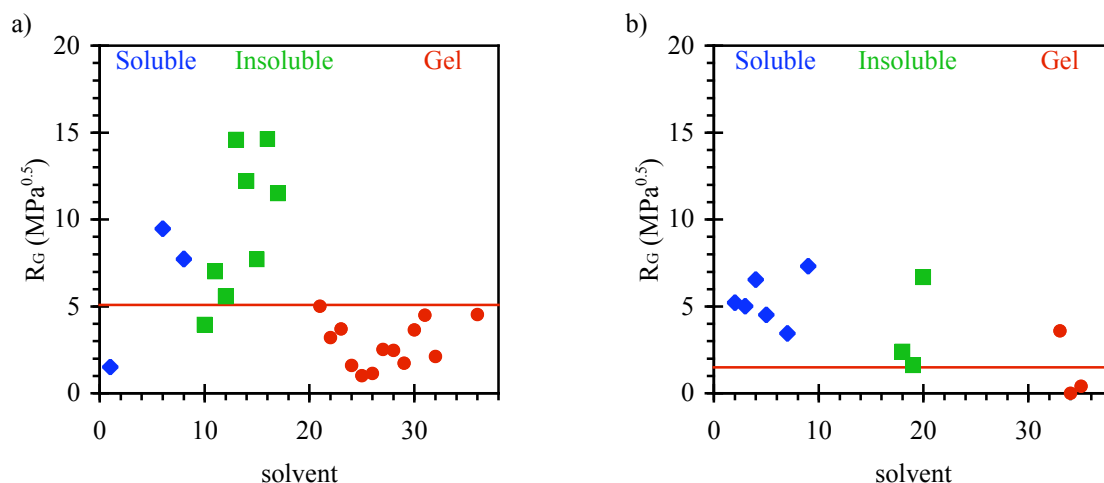

Figure S16. A better correlation is obtained by considering 2 gelation spheres: the same data as in figure S15b is plotted again. Each solvent is represented only once, either in figure S16a or in figure S16b: only the shortest distance to the gelation sphere centers is considered. Distances in Hansen space to the centre of the **first gelation sphere** [ $\delta_d = 17.8$ ;  $\delta_p = 0.0$ ;  $\delta_h = 1.2$ ;  $R_{Gel} = 5.0$ ] (a) or to the centre of the **second gelation sphere** [ $\delta_d = 13.9$ ;  $\delta_p = 4.3$ ;  $\delta_h = 0.6$ ;  $R_{Gel} = 5.0$ ] (b) for LMWG 7. The line represents the radius of the sphere. Blue: soluble; red: gel; green: insoluble.

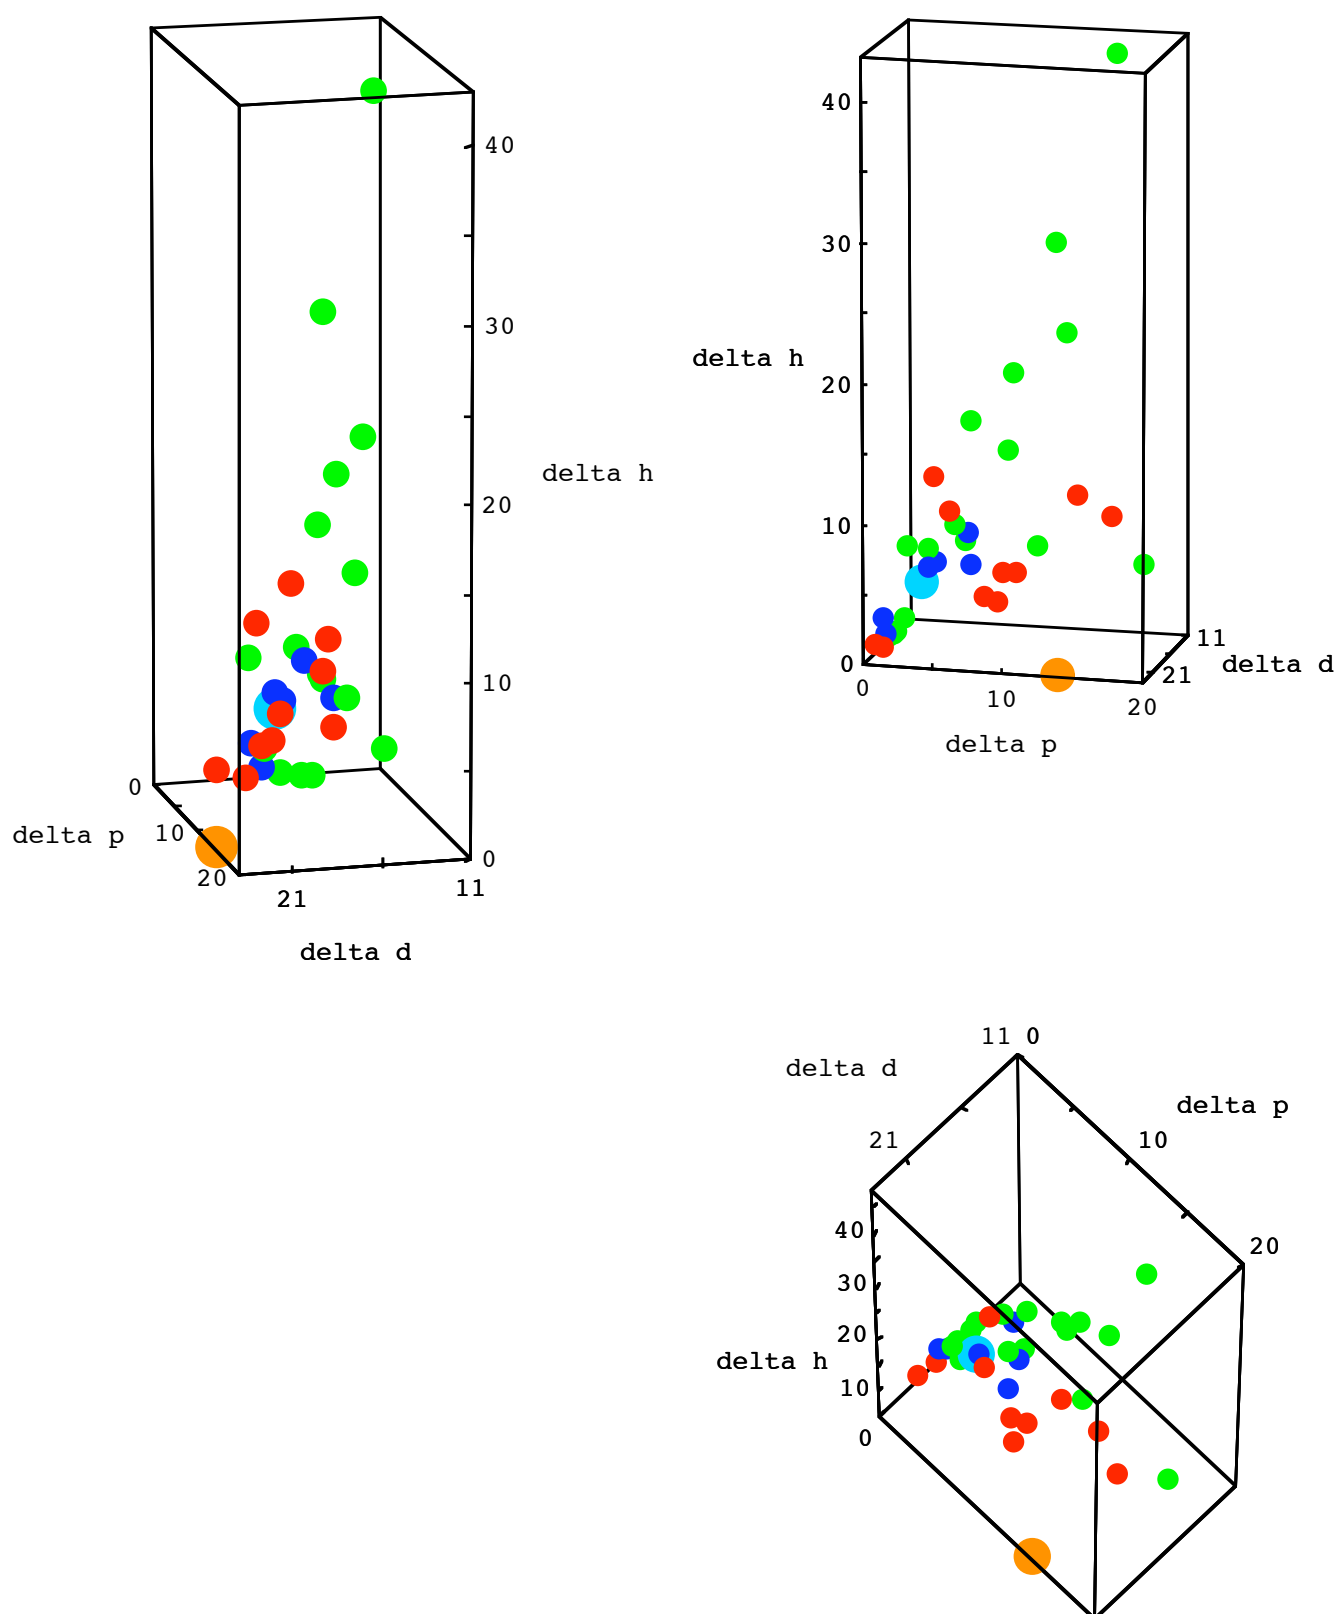

Figure S17. Solubility data for LMWG **8** (< 70g/L, 2-20°C) represented in Hansen space (Units:  $\text{MPa}^{0.5}$ ) (data taken from reference 8). Blue: soluble; red: gel; green: insoluble. Cyan: centre of the solubility sphere; orange: centre of the gelation sphere.



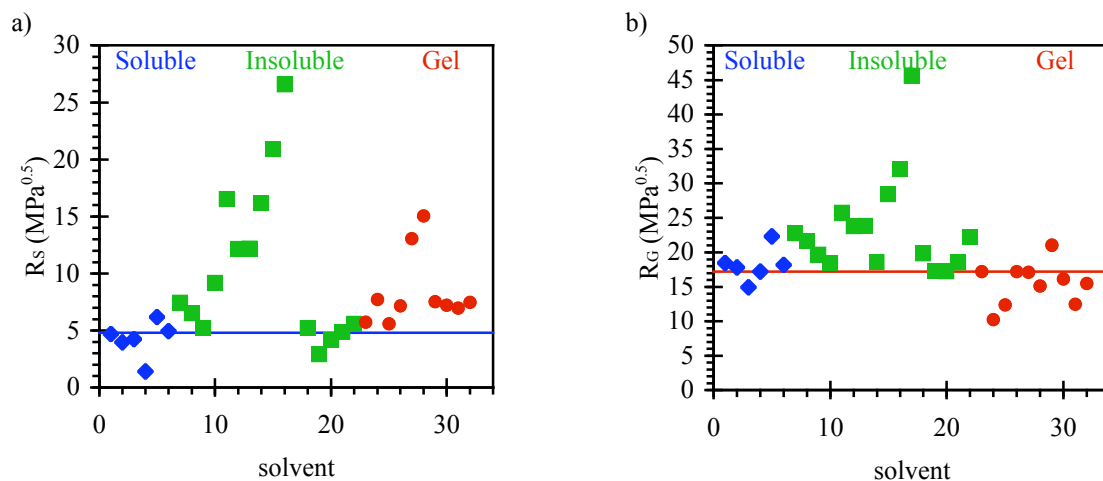

Figure S18. Distances in Hansen space to the centre of the **solubility sphere** [ $\delta_d = 17.6$ ;  $\delta_p = 2.6$ ;  $\delta_h = 4.5$ ;  $R_{sol} = 4.8 \text{ MPa}^{0.5}$ ] (a) or to the centre of the **gelation sphere** [ $\delta_d = 23.8$ ;  $\delta_p = 14.0$ ;  $\delta_h = 0.0$ ;  $R_{gel} = 17.2 \text{ MPa}^{0.5}$ ] (b) for LMWG 8. The line represents the radius of the sphere. Blue: soluble; red: gel; green: insoluble.

## References

- 1 O. Gronwald and S. Shinkai, *Chem. Eur. J.*, 2001, **7**, 4329.
- 2 N. Amanokura, K. Yoza, H. Shinmori, S. Shinkai and D. Reinhoudt, *J. Chem. Soc., Perkin Trans. 2*, 1998, 2585.
- 3 J.-W. Liu, J.-T. Ma and C.-F. Chen, *Tetrahedron*, 2011, **67**, 85.
- 4 N. Yan, G. He, H. Zhang, L. Ding and Y. Fang, *Langmuir*, 2010, **26**, 5909.
- 5 K. Hanabusa, H. Kobayashi, M. Suzuki, M. Kimura and H. Shirai, *Colloid Polym. Sci.*, 1998, **276**, 252.
- 6 D. R. Trivedi, A. Ballabh, P. Dastidar and B. Ganguly, *Chem. Eur. J.*, 2004, **10**, 5311.
- 7 R. Mukkamala and R. G. Weiss, *Langmuir*, 1996, **12**, 1474.
- 8 K. Murata, M. Aoki, T. Suzuki, T. Harada, H. Kawabata, T. Komori, F. Ohseto, K. Ueda and S. Shinkai, *J. Am. Chem. Soc.*, 1994, **116**, 6664.
